# Supplementary material
Source: publisher site journal article supplement (https://www.kjim.org/upload/media/kjim-2018-247-suppl2.pdf)
Supplement: Supplementary file 1 [file kjim-2018-247-suppl2.pdf]

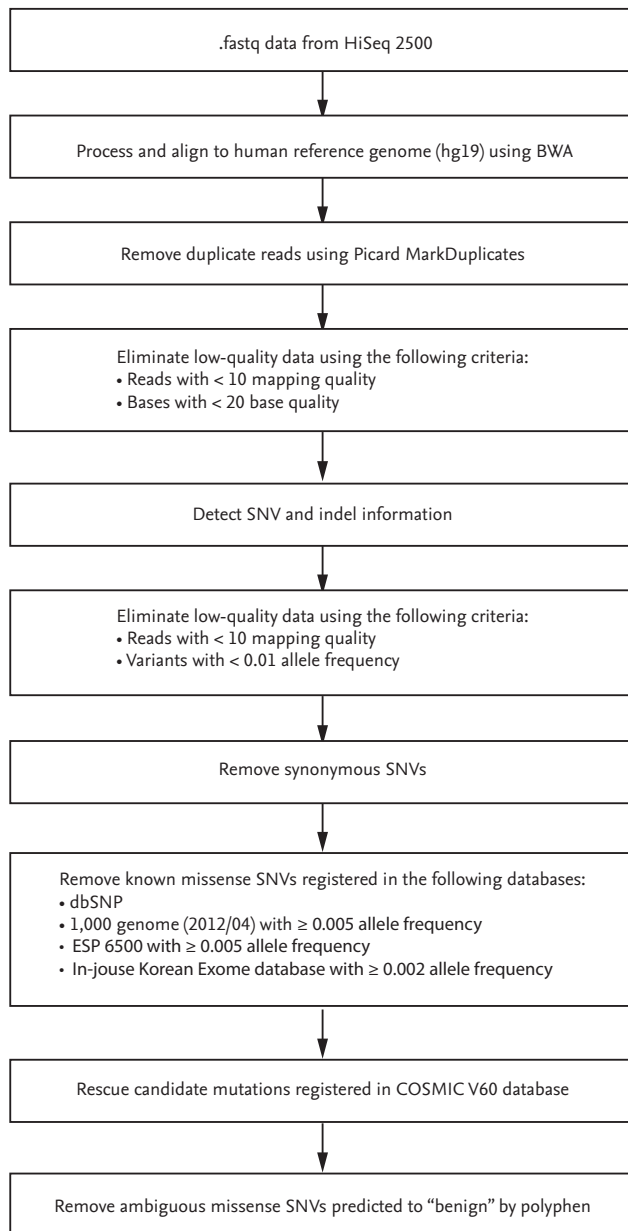

**Supplementary Figure 1.** Sequencing data processing and variant calling process. BWA, Burrows-Wheeler-Aligner; SNV, single nucleotide variants; dbSNP, single nucleotide polymorphism database; ESP, exome sequencing project; COSMIC, Catalogue Of Somatic Mutations In Cancer.
